# Supplementary material
Source: Springer Nature journal article supplement (https://www.springermedizin.de/resource/supplementary/12957_2011_1072_MOESM2_ESM.pdf/9562192)
Supplement: MOESM2 [file 9562192]

Brown.combined.Pvalues.txt

```
#####
#
# Fisher 1948 combined test of significance for independent tests
# Mosteller F, Fisher RA. Combining independent tests of significance.
# The American Statistician, Vol. 2, No. 5 (Oct., 1948), pp. 30-31.
# Brown MB. A Method for Combining Non-Independent,
# One-Sided Tests of Significance.
# Biometrics, Vol. 31, No. 4 (Dec., 1975), pp. 987-992.
# R 2.14.1's implementation Vincent Vinh-Hung
# March 12, 2012
# Manuscript WJSO 'scapula alata'
#
#####

# data frame of shoulder/arm measurements
y <- mc.iml[,c("volume.O.rc1", "abduction.O.rc1"
              , "retroflex.O.rc1", "anteflex.O.rc1"
              , "endorot.O.rc1", "scap.dist.O.rc1")]
y[,2] <- -y[,2] # see manuscript's note on morbidity sign convention
y[,3] <- -y[,3] #
y[,4] <- -y[,4] #
# pre-RT scapula alata indicator, 0=no, 1=yes
x <- mc.iml$scap.wing.T0

# Fisher's combined X2

fx2 <- c(-2*sum(log(sapply(1:ncol(y), function(i)
                          t.test(y[,i][x==0],mu=0,alternative="greater")$p.value))),
         -2*sum(log(sapply(1:ncol(y), function(i)
                          t.test(y[,i][x==1],mu=0,alternative="greater")$p.value))))
1-pchisq(fx2,ncol(y)*2)

# Brown 1975

#  $E(X^2) = 2 * k$ , where  $k =$  number of tests
#  $s^2(X^2) = 4 * k + 2 * \sum_{i < j} \text{cov}(-2 \log p_i, -2 \log p_j)$ 
# where  $\text{cov}(-2 \log p_i, -2 \log p_j) =$ 
#  $r * (3.25 + .75 * r)$  if  $0 \leq r \leq 1$ 
#  $r * (3.27 + .71 * r)$  if  $-.5 \leq r \leq 0$ 
# or get cov from Brown's table
# c(0,.334,.681,1.044,1.421,1.812,2.219,2.641,3.079,3.531,4.000)
# c(0,-.320,-.625,-.916,-1.194,-1.458,-1.709,-1.946,-2.17,-2.382,-2.590)
# last value -2.590 was not in Brown's original paper,
# added by VVH to simplify interpolation using R's function approx
tmp <-
c(-2.59,-2.382,-2.17,-1.946,-1.709,-1.458,-1.194,-.916,-.625,-.320,
  0,.334,.681,1.044,1.421,1.812,2.219,2.641,3.079,3.531,4)
s2X2 <- 4 * ncol(y) + 2 * sum ( approx( seq(-1,1,.1),tmp,
                                       xout=cor(y)[which( as.vector(lower.tri(cor(y))) )] )$y )
# newdf "f" =  $2 * (2 * k)^2 / s2X2$ 
# X2 ccorrection "c" =  $s2X2 / (2 * k)$ 
1-pchisq(fx2/(s2X2/(2*ncol(y))), 2 * (2 * ncol(y))^2 / s2X2)
```
